# Supplementary material
Source: bioRxiv or medRxiv preprint supplement (https://www.biorxiv.org/content/biorxiv/early/2021/06/29/2020.10.23.352286/DC2/embed/media-2.pdf)
Supplement: Supplementary file [file media-2.pdf]

| Triplet analysed                                                 | Geneflow pair | outgroup                | Proportion of windows with gene flow | BIC2Dist (IBS + Geneflow) | BIC1Dist (IBS alone) | BIC difference | Significant for gene flow (BIC difference <10) | Number of trees | Percentage of total trees (2161) from triplet | Percentage of trees supporting topology explained by gene flow |
|------------------------------------------------------------------|---------------|-------------------------|--------------------------------------|---------------------------|----------------------|----------------|------------------------------------------------|-----------------|-----------------------------------------------|----------------------------------------------------------------|
| Indo-Pacific Bottlenose dolphin_Bottlenose dolphin_K             | Bot-Orca      | Indo-Pacific Bottlenose | 1                                    | -47.1718                  | -40.833              | -6.34          | No                                             | 4               | 0.19                                          | 1.09                                                           |
| Pilot whale_Bottlenose dolphin_Killer whale                      | Bot-Orca      | Pilot whale             | 0.994524                             | -4176.75                  | -4015.52             | -161.23        | Yes                                            | 363             | 16.80                                         | 44.13                                                          |
| White-sided dolphin_Bottlenose dolphin_Killer whale              | Bot-Orca      | White-sided dolphin     | 0.932662                             | -5203                     | -5001.75             | -201.25        | Yes                                            | 451             | 20.87                                         | 51.55                                                          |
| Indo-Pacific Bottlenose dolphin_Bottlenose dolphin_K             | Indo-Orca     | Bottlenose dolphin      | 1                                    | -35.0559                  | -32.055              | -3.00          | No                                             | 3               | 0.14                                          | 0.37                                                           |
| Pilot whale_Indo-Pacific Bottlenose dolphin_Killer whale         | Indo-Orca     | Pilot whale             | 0.994149                             | -4163.39                  | -4003.35             | -160.04        | Yes                                            | 362             | 16.75                                         | 44.27                                                          |
| White-sided dolphin_Indo-Pacific Bottlenose dolphin_K            | Indo-Orca     | White-sided dolphin     | 0.936622                             | -5157.77                  | -4961.79             | -195.98        | Yes                                            | 448             | 20.73                                         | 91.82                                                          |
| Pilot whale_Indo-Pacific Bottlenose dolphin_Bottlenose dolphin   | Pilot-Bot     | Indo-Pacific Bottlenose | 1                                    | -56.1656                  | -53.3674             | -2.80          | No                                             | 5               | 0.23                                          | 1.09                                                           |
| Pilot whale_Indo-Pacific Bottlenose dolphin_Bottlenose dolphin   | Pilot-Indo    | Bottlenose dolphin      | 0.26425                              | -43.6088                  | -44.5198             | 0.91           | No                                             | 4               | 0.19                                          | 0.15                                                           |
| Pilot whale_Bottlenose dolphin_Killer whale                      | Pilot-Orca    | Bottlenose dolphin      | 0.89395                              | -4149.09                  | -3995.26             | -153.83        | Yes                                            | 353             | 16.34                                         | 26.63                                                          |
| Pilot whale_Indo-Pacific Bottlenose dolphin_Killer whale         | Pilot-Orca    | Indo-Pacific Bottlenose | 0.894701                             | -4145.01                  | -3991.4              | -153.61        | Yes                                            | 353             | 16.34                                         | 24.46                                                          |
| White-sided dolphin_Pilot whale_Killer whale                     | Pilot-Orca    | White-sided dolphin     | 0.890091                             | -5551.99                  | -5354.47             | -197.52        | Yes                                            | 479             | 22.17                                         | 30.52                                                          |
| White-sided dolphin_Pilot whale_Bottlenose dolphin               | Pilot-White   | Bottlenose dolphin      | 0.885824                             | -5329.17                  | -5126.07             | -203.10        | Yes                                            | 459             | 21.24                                         | 44.05                                                          |
| White-sided dolphin_Pilot whale_Indo-Pacific Bottlenose dolphin  | Pilot-White   | Indo-Pacific Bottlenose | 0.883297                             | -5332.08                  | -5127.41             | -204.67        | Yes                                            | 459             | 21.24                                         | 37.09                                                          |
| White-sided dolphin_Indo-Pacific Bottlenose dolphin_Killer whale | White-Bot     | Indo-Pacific Bottlenose | 0.99938                              | -53.2849                  | -53.8868             | 0.60           | No                                             | 5               | 0.23                                          | 0.46                                                           |
| White-sided dolphin_Pilot whale_Bottlenose dolphin               | White-Bot     | Pilot whale             | 0.870174                             | -7160.67                  | -6929.73             | -230.94        | Yes                                            | 629             | 29.11                                         | 86.33                                                          |
| White-sided dolphin_Indo-Pacific Bottlenose dolphin_Killer whale | White-Indo    | Bottlenose dolphin      | 0.859332                             | -41.6525                  | -42.3186             | 0.67           | No                                             | 4               | 0.19                                          | 0.31                                                           |
| White-sided dolphin_Pilot whale_Indo-Pacific Bottlenose dolphin  | White-Indo    | Pilot whale             | 0.871914                             | -7154.12                  | -6919.18             | -234.94        | Yes                                            | 628             | 29.06                                         | 49.33                                                          |
| White-sided dolphin_Bottlenose dolphin_Killer whale              | White-Orca    | Bottlenose dolphin      | 0.974941                             | -5679.95                  | -5365.25             | -314.70        | Yes                                            | 478             | 22.12                                         | 29.40                                                          |
| White-sided dolphin_Indo-Pacific Bottlenose dolphin_Killer whale | White-Orca    | Indo-Pacific Bottlenose | 0.975064                             | -5687.27                  | -5373.09             | -314.18        | Yes                                            | 479             | 22.17                                         | 31.43                                                          |
| White-sided dolphin_Pilot whale_Killer whale                     | White-Orca    | Pilot whale             | 0.953523                             | -6205.88                  | -5910.93             | -294.95        | Yes                                            | 529             | 24.48                                         | 50.04                                                          |

| Triplet analysed                                                 | Geneflow pair | outgroup           | Proportion of windows with gene flow | BIC2Dist (IBS + Geneflow) | BIC1Dist (IBS alone) | BIC difference | Significant for gene flow (BIC difference <10) | Number of trees | Percentage of total trees (2730) from triplet | Percentage of trees supporting topology explained by gene flow |
|------------------------------------------------------------------|---------------|--------------------|--------------------------------------|---------------------------|----------------------|----------------|------------------------------------------------|-----------------|-----------------------------------------------|----------------------------------------------------------------|
| Indo-Pacific Bottlenose dolphin_Bottlenose dolphin_Killer whale  | Bot-Orca      | Indo-Pacific Bottl | 0.82                                 | -143.55                   | -144.83              | 1.28           | No                                             | 13              | 0.48                                          | 0.39                                                           |
| Pilot whale_Bottlenose dolphin_Killer whale                      | Bot-Orca      | Pilot whale        | 0.64                                 | -5877.09                  | -5828.01             | -49.08         | Yes                                            | 543             | 19.89                                         | 12.79                                                          |
| White-sided dolphin_Bottlenose dolphin_Killer whale              | Bot-Orca      | White-sided dolp   | 0.68                                 | -6493.50                  | -6410.93             | -82.57         | Yes                                            | 589             | 21.58                                         | 14.76                                                          |
| Indo-Pacific Bottlenose dolphin_Bottlenose dolphin_Killer whale  | Indo-Orca     | Bottlenose dolph   | 0.85                                 | -82.72                    | -81.61               | -1.11          | No                                             | 8               | 0.29                                          | 0.25                                                           |
| Pilot whale_Indo-Pacific Bottlenose dolphin_Killer whale         | Indo-Orca     | Pilot whale        | 0.67                                 | -5836.61                  | -5777.56             | -59.05         | Yes                                            | 539             | 19.74                                         | 13.24                                                          |
| White-sided dolphin_Indo-Pacific Bottlenose dolphin_Killer whale | Indo-Orca     | White-sided dolp   | 0.69                                 | -6501.26                  | -6417.36             | -83.90         | Yes                                            | 590             | 21.61                                         | 14.82                                                          |
| Pilot whale_Indo-Pacific Bottlenose dolphin_Bottlenose dolphin   | Pilot-Bot     | Indo-Pacific Bottl | 0.80                                 | -306.79                   | -305.15              | -1.64          | No                                             | 28              | 1.03                                          | 0.82                                                           |
| Pilot whale_Indo-Pacific Bottlenose dolphin_Bottlenose dolphin   | Pilot-Indo    | Bottlenose dolph   | 0.46                                 | -330.52                   | -336.87              | 6.35           | No                                             | 31              | 1.14                                          | 0.52                                                           |
| Pilot whale_Bottlenose dolphin_Killer whale                      | Pilot-Orca    | Bottlenose dolph   | 0.48                                 | -5643.28                  | -5648.29             | 5.01           | No                                             | 521             | 19.08                                         | 9.13                                                           |
| Pilot whale_Indo-Pacific Bottlenose dolphin_Killer whale         | Pilot-Orca    | Indo-Pacific Bottl | 0.51                                 | -5701.86                  | -5699.31             | -2.55          | No                                             | 525             | 19.23                                         | 9.77                                                           |
| Pilot whale_White-sided dolphin_Killer whale                     | Pilot-Orca    | White-sided dolp   | 0.55                                 | -6892.35                  | -6861.90             | -30.45         | Yes                                            | 631             | 23.11                                         | 12.75                                                          |
| Pilot whale_White-sided dolphin_Bottlenose dolphin               | Pilot-White   | Bottlenose dolph   | 0.59                                 | -7033.39                  | -6989.18             | -44.21         | Yes                                            | 648             | 23.74                                         | 14.00                                                          |
| Pilot whale_White-sided dolphin_Indo-Pacific Bottlenose dolphin  | Pilot-White   | Indo-Pacific Bottl | 0.59                                 | -7073.33                  | -7026.60             | -46.73         | Yes                                            | 651             | 23.85                                         | 14.15                                                          |
| Pilot whale_White-sided dolphin_Bottlenose dolphin               | White-Bot     | Pilot whale        | 0.51                                 | -9197.44                  | -9186.93             | -10.51         | Yes                                            | 865             | 31.68                                         | 16.05                                                          |
| White-sided dolphin_Indo-Pacific Bottlenose dolphin_Bottlenose d | White-Bot     | Indo-Pacific Bottl | 0.63                                 | -257.04                   | -258.27              | 1.24           | No                                             | 24              | 0.88                                          | 0.56                                                           |
| Pilot whale_White-sided dolphin_Indo-Pacific Bottlenose dolphin  | White-Indo    | Pilot whale        | 0.49                                 | -9117.94                  | -9115.68             | -2.26          | No                                             | 858             | 31.43                                         | 15.41                                                          |
| White-sided dolphin_Indo-Pacific Bottlenose dolphin_Bottlenose d | White-Indo    | Bottlenose dolph   | 0.40                                 | -170.67                   | -176.49              | 5.81           | No                                             | 16              | 0.59                                          | 0.23                                                           |
| Pilot whale_White-sided dolphin_Killer whale                     | White-Orca    | Pilot whale        | 0.67                                 | -8498.20                  | -8408.06             | -90.14         | Yes                                            | 784             | 28.72                                         | 19.25                                                          |
| White-sided dolphin_Bottlenose dolphin_Killer whale              | White-Orca    | Bottlenose dolph   | 0.75                                 | -7986.93                  | -7853.23             | -133.70        | Yes                                            | 726             | 26.59                                         | 19.83                                                          |
| White-sided dolphin_Indo-Pacific Bottlenose dolphin_Killer whale | White-Orca    | Indo-Pacific Bottl | 0.75                                 | -7983.67                  | -7846.07             | -137.60        | Yes                                            | 726             | 26.59                                         | 20.03                                                          |
